# Supplementary material for: Temperature responses of photosynthesis and respiration in evergreen trees from boreal to tropical latitudes
Source: PubMed Central journal article supplement — New Phytol. 2022 Jan 30;234(2):353–74. doi: 10.1111/nph.17951 (PMC9994441; doi:10.1111/nph.17951), 2022-01-30
Supplement: NPH-234-353-s001.pdf [file NPH-234-353-s001.pdf]

**New Phytologist Supporting Information**

Article title: **Temperature responses of photosynthesis and respiration in evergreen trees from boreal to tropical latitudes**

Authors: Crous Kristine Y, Uddling Johan, De Kauwe Martin G

Article acceptance date: 03 December 2021

The following Supporting Information is available for this article:

**Fig. S1.** Boxplots and relationship between biome, mean annual temperature and mean temperature of the warmest quarter in the ESWE dataset.

**Fig. S2.** Partial residuals with 95% confidence intervals (grey area) of the ANCOVA as a function of mean temperature of the warmest quarter (meanTWQ) to represent the effect of biome.

**Fig. S3.** Linear regression relationships with 95% confidence intervals (grey area) between several variables against experimental control growth temperatures across biomes.

**Fig. S4.** Partial residuals with 95% confidence intervals (grey area) from the ANCOVA as a function of mean annual temperature (mat) to represent the effect of biome.

**Fig. S5.** Linear relationships with 95% confidence intervals (grey area) against experimental control growth temperature for the response ratio (RR) of (a) net photosynthesis at 25°C,  $A_{net25}$  and (b) respiration rates at prevailing growth temperatures,  $R_{growth}$ .

**Table S1.** Species list per biome and plant functional type, including latitude and longitude, the reference where the data originated and whether the study used controlled conditions or not.

**Table S2.** ANCOVA results with mean annual temperature as a covariate for both (a) control values and (b) the response ratios.

**Table S3.** Table with sample sizes for each variable in each category (warming amount, biome and leaf form).

**Fig. S1.** Boxplots of mean annual temperature, MAT (a) and mean temperature of the warmest quarter, Mean TWQ (b) per biome category indicated in the reference study. The boxplots consist of a central box representing the interquartile data range with the median shown as the bold line. Whiskers extend 1.5 times beyond the interquartile range or to the most extreme value, whichever is smaller. The small open circles are individual data points within a given biome outside the range of the whiskers. Both MAT and mean TWQ were good proxies for biome. There was a strong, positive relationship between mean annual temperature and mean temperature of the warmest quarter in the ESWE dataset ( $\text{MAT} = 1.30x - 11.96$ ,  $R^2 = 0.71$ ,  $p < 0.0001$ ) (c). Colours indicate biome (Bor = boreal in skyblue, Temp = temperate in green and Trop = tropical in black). Leaf form is represented with different symbols with triangles for needleleaf and circles for broadleaf species.

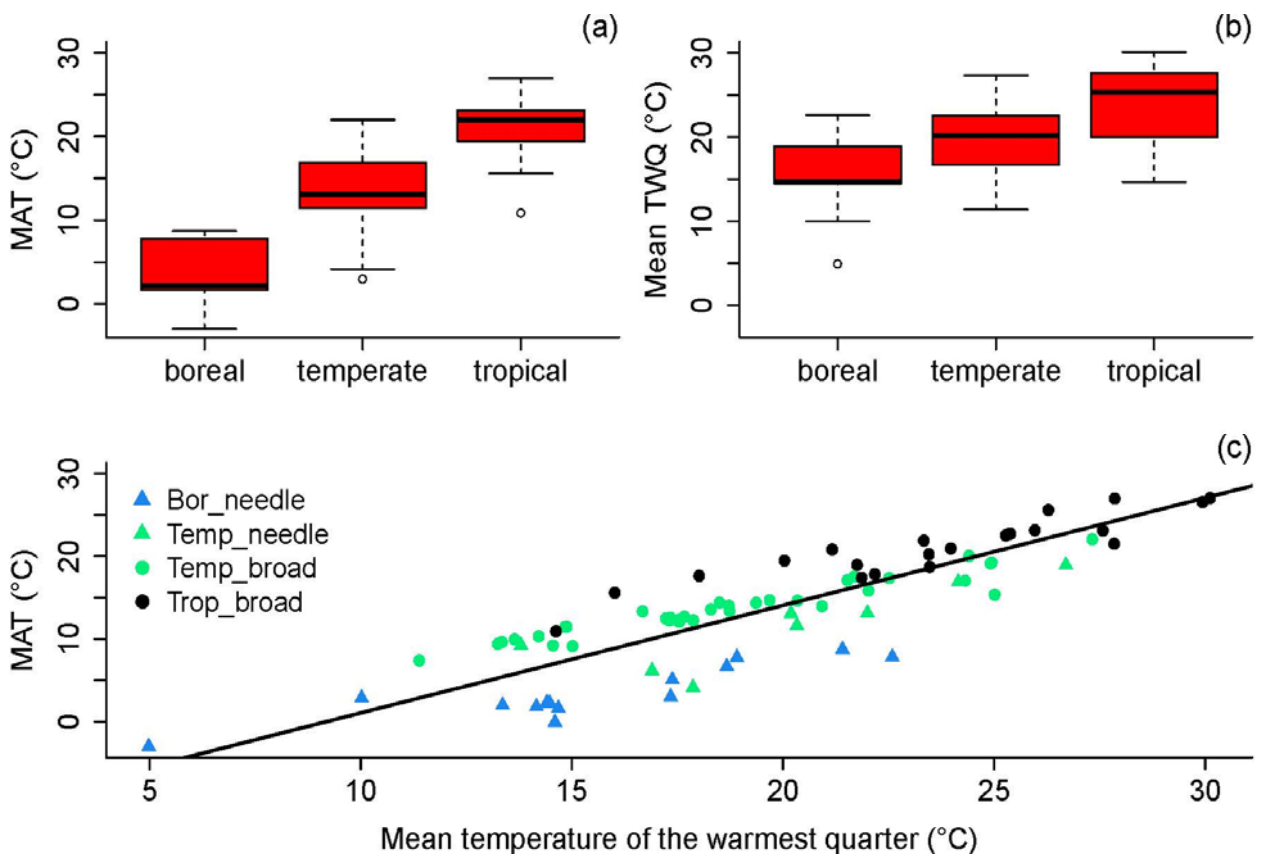

**Fig. S2.** Partial residuals with 95% confidence intervals (grey area) of the ANCOVA as a function of mean temperature of the warmest quarter (meanTWQ) from the *visreg* R package to represent the effect of biome for (a) maximum carboxylation rate at 25 °C,  $V_{\text{cmax}25}$  (slope of  $V_{\text{cmax}25} = \exp(-0.0345x)$ ), (b) maximum electron transport rates at 25 °C (slope of  $J_{\text{max}25} = \exp(-0.0613x)$ ), (c) the ratio of  $J_{\text{max}25}$  to  $V_{\text{cmax}25}$  (slope of  $J:V_{25} = \exp(-0.0281x)$ ), (d) net photosynthesis measured at 25 °C,  $A_{\text{net}25}$  (slope of  $A_{\text{net}25} = \exp(-0.367x)$ ), (e) respiration measured at 25 °C,  $R_{25}$  (slope of  $R_{25} = \exp(-0.0312x)$ ) and (f) area-based nitrogen,  $N_a$  (slope of  $N_a = \exp(-0.0798x)$ ). Colours indicate biome (Bor = boreal in skyblue, Temp = temperate in green and Trop = tropical in black). Leaf form is represented with different symbols with triangles for needleleaf and circles for broadleaf species). Corresponding statistics using mean annual temperature as a covariate are shown in Table S2.

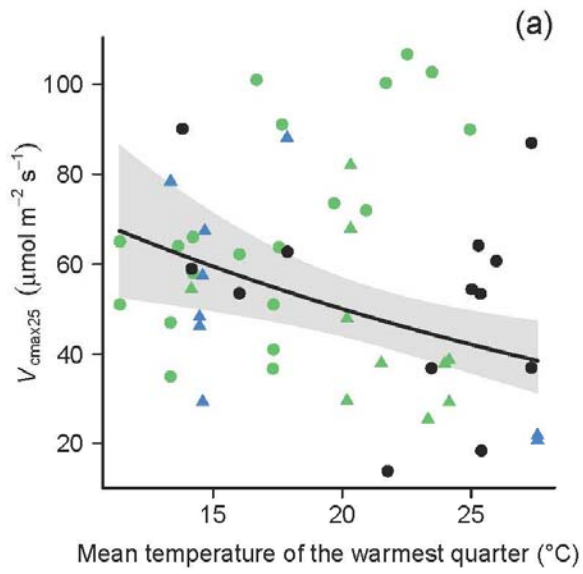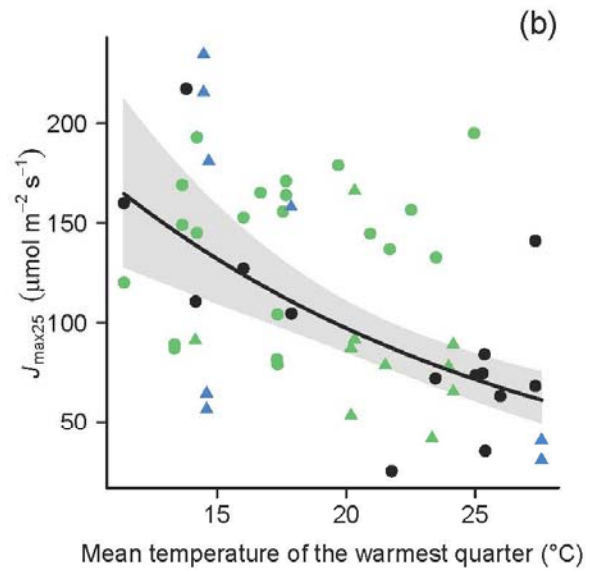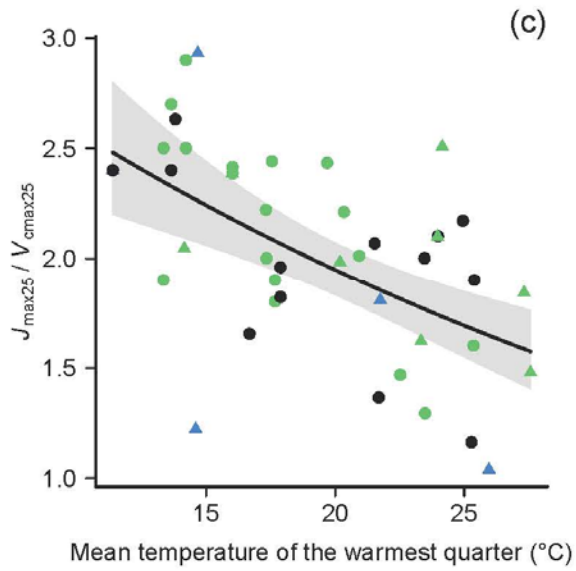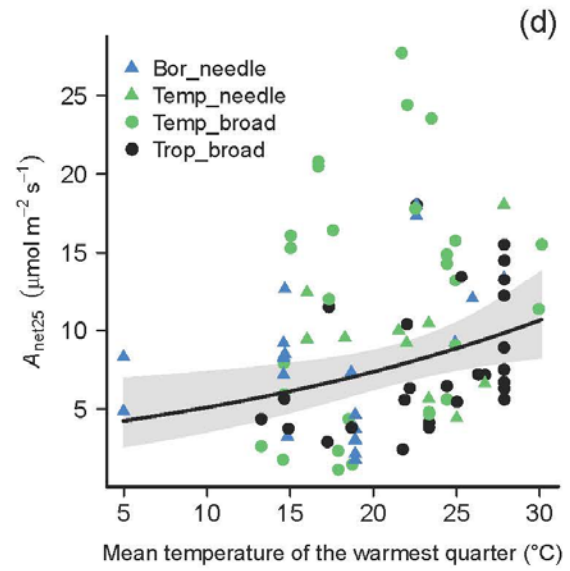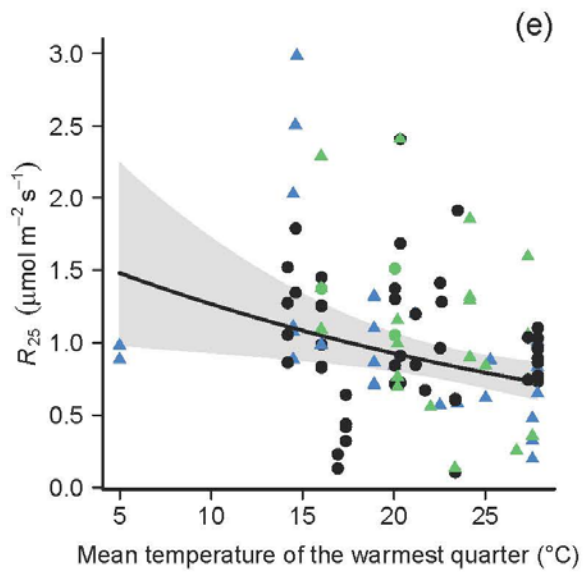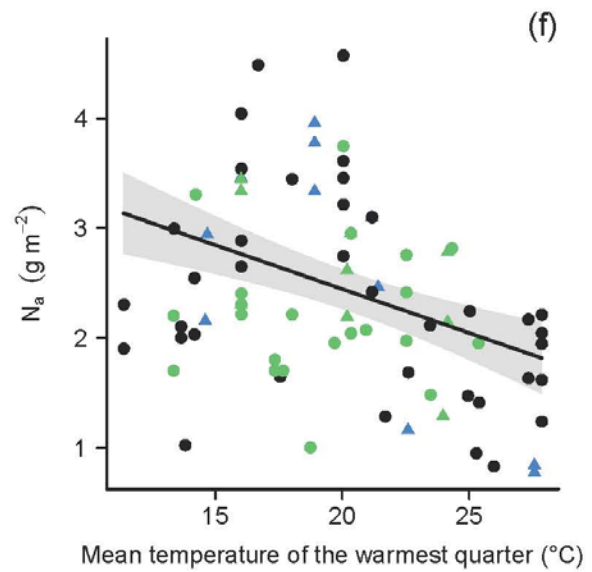

**Fig. S3.** Linear regression relationships with 95% confidence intervals (grey area) between several variables against experimental control growth temperatures across biomes (Bor = boreal in skyblue, Temp = temperate in green and Trop = tropical in black) in control conditions for (a) maximum carboxylation rate at 25 °C,  $V_{\text{cmax}25}$ , (b) maximum electron transport rates at 25 °C ( $J_{\text{max}25} = -4.14x + 176.89$ ,  $R^2 = 0.15$ ,  $p = 0.0008$ ), (c) the ratio of  $J_{\text{max}25}$  to  $V_{\text{cmax}25}$  ( $J_{\text{max}25}/V_{\text{cmax}25} = -0.042 + 2.73$ ,  $R^2 = 0.20$ ,  $p = 0.001$ ), (d) net photosynthesis measured at a common temperature of 25 °C,  $A_{\text{net}25}$ , (e) nitrogen content ( $N_a = -0.0797x + 4.035$ ,  $R^2 = 0.14$ ,  $p < 0.0001$ ) and (f) the temperature optimum of photosynthesis ( $T_{\text{optA}} = 0.477x + 12.855$ ,  $R^2 = 0.24$ ,  $p = 0.0004$ ). Leaf form is represented with different symbols with triangles for needleleaf and circles for broadleaf species.

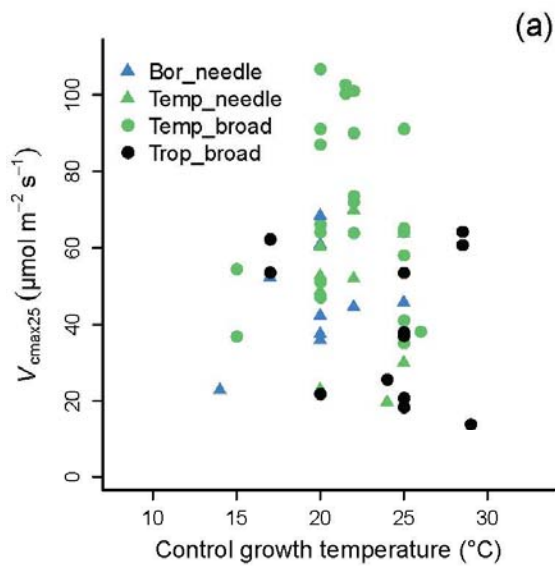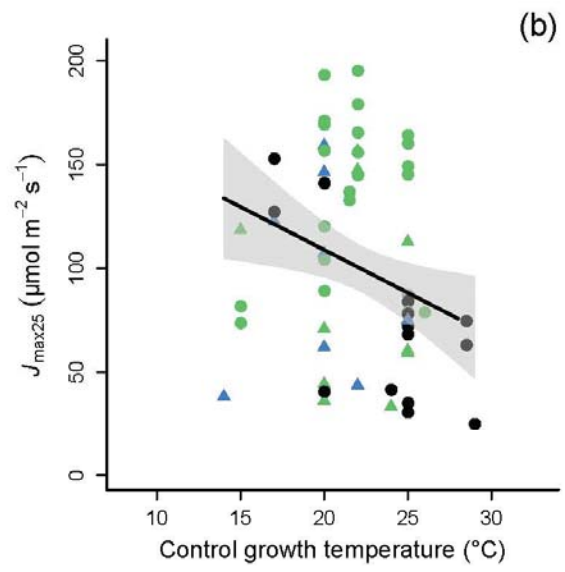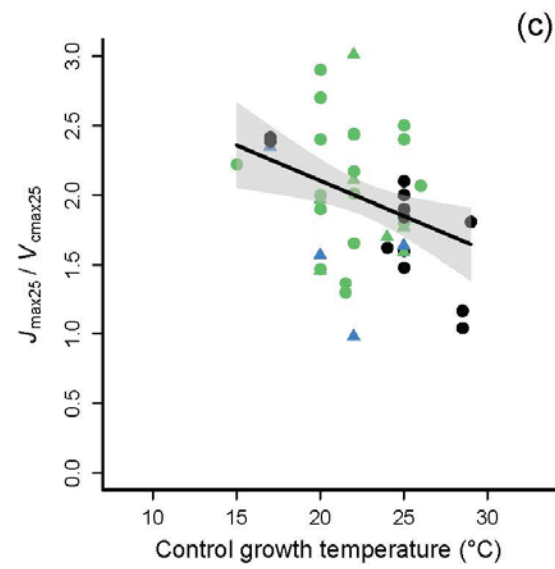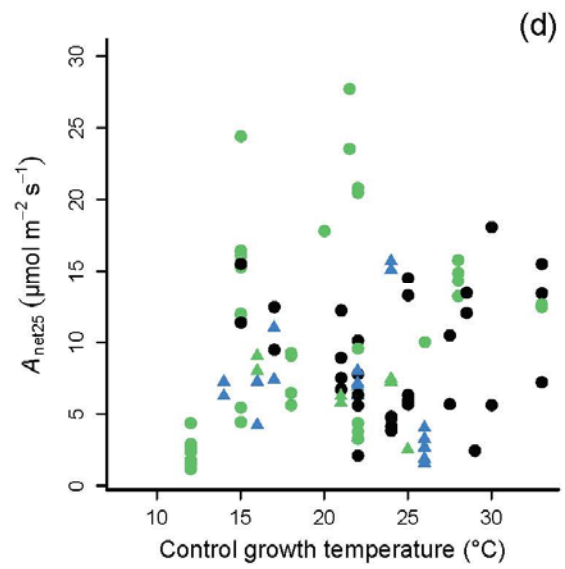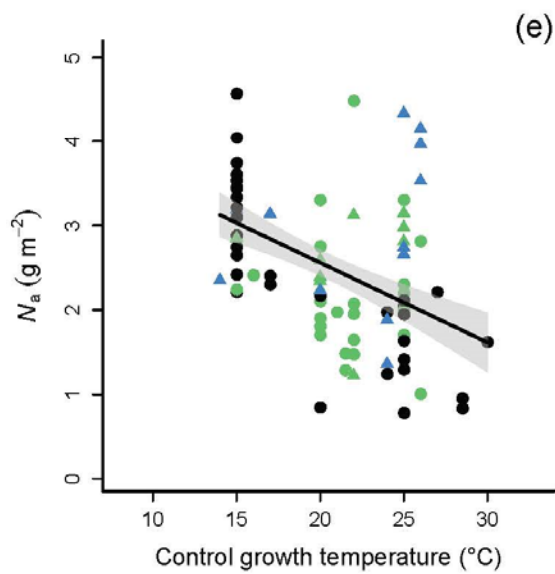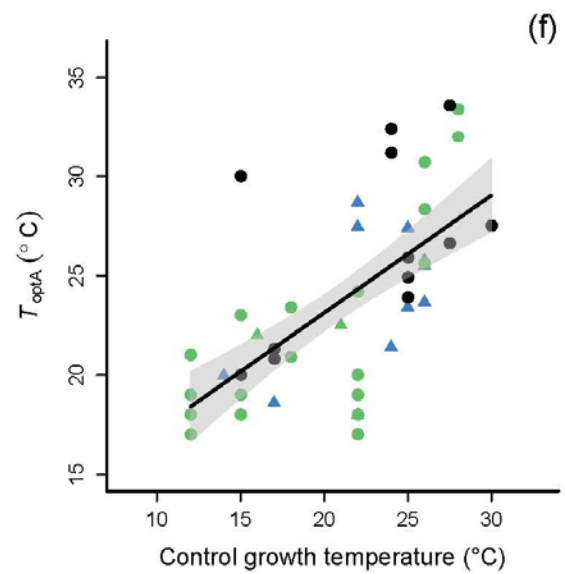

**Fig. S4.** Partial residuals with 95% confidence intervals (grey area) from the ANCOVA as a function of mean annual temperature (mat) from the *visreg* R package to represent the effect of biome for (a) the maximum carboxylation rate at 25 °C (slope of  $V_{\text{cmax}25} = \exp(-0.031x)$ ), (b) the maximum electron transport rate at 25 °C (slope of  $J_{\text{cmax}25} = \exp(-0.049x)$ ), (c) the  $J_{\text{max}}/V_{\text{cmax}}$  ratio measured at 25 °C (slope of  $J:V_{25} = \exp(-0.019x)$ ), (d) net photosynthesis at 25 °C,  $A_{\text{net}25}$  (slope of  $A_{\text{net}25} = \exp(0.025x)$ ), (e) the temperature optimum of photosynthesis,  $T_{\text{optA}}$  (slope of  $T_{\text{optA}} = \exp(0.018x)$ ) and (f) area-based nitrogen,  $N_a$  (slope of  $N_a = \exp(-0.032x)$ ). Colours indicate biome (Bor = boreal in skyblue, Temp = temperate in green and Trop = tropical in black). Leaf form is represented with different symbols with triangles for needleleaf and circles for broadleaf species). Corresponding statistics using mean annual temperature as a covariate are shown in Table S2.



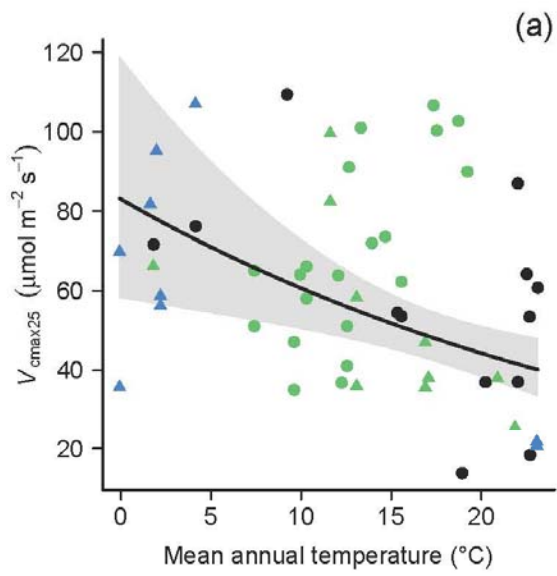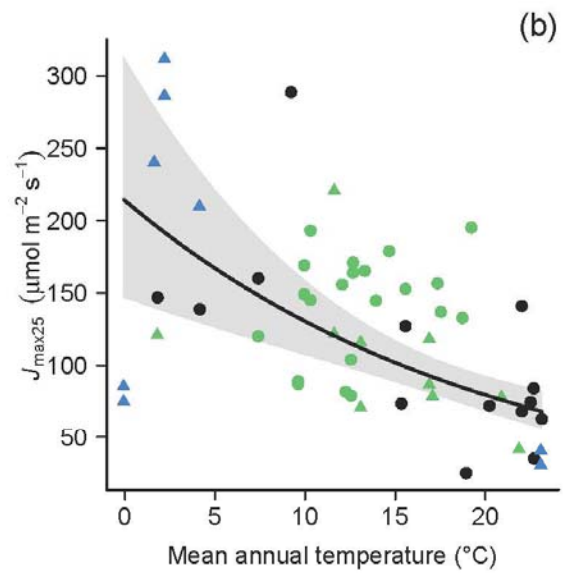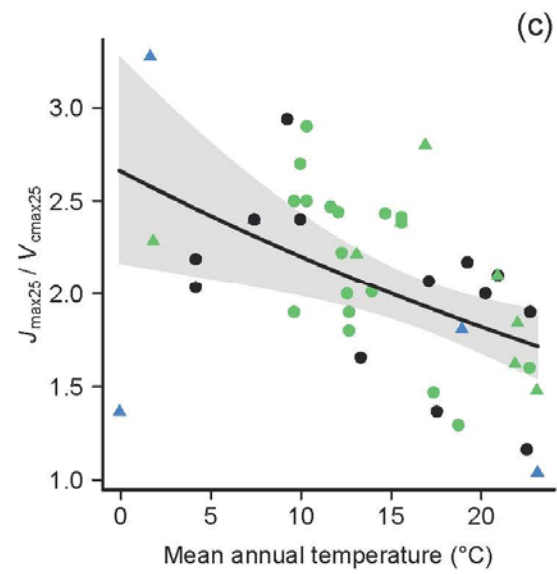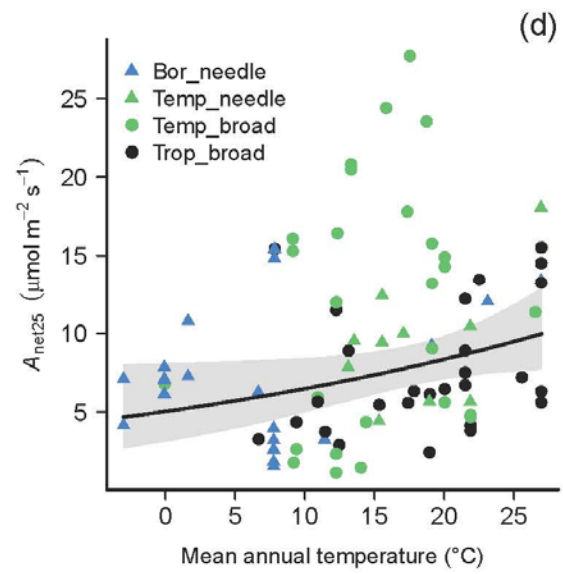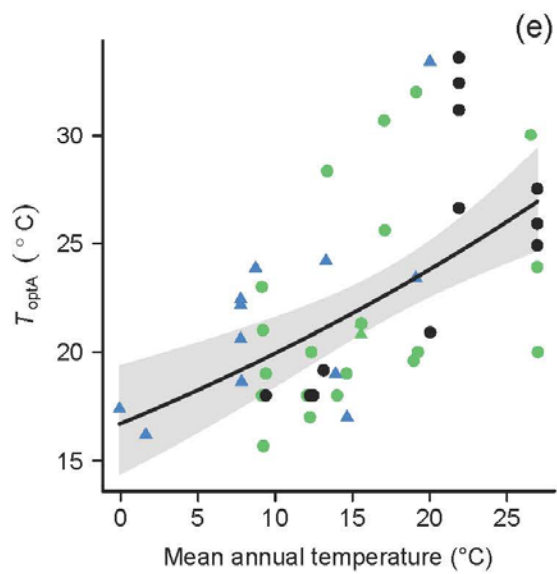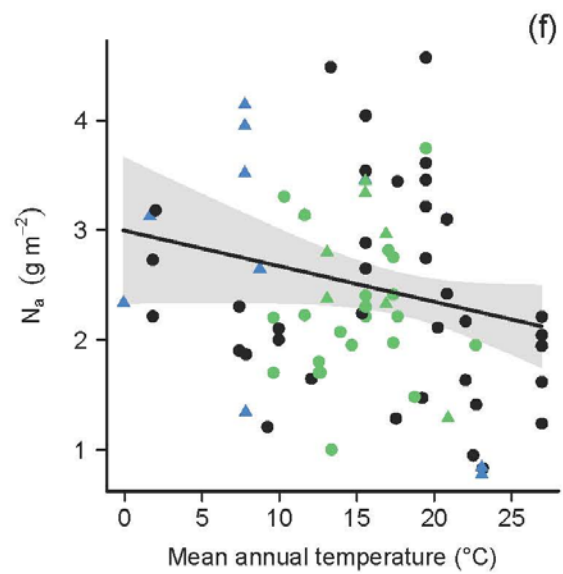

**Fig. S5.** Linear relationships with 95% confidence intervals (grey area) against experimental control growth temperature for the response ratio (RR) of (a)  $A_{\text{net}25}$  ( $\text{RR}_{A_{\text{net}25}} = -0.0219x + 1.432$ ,  $R^2 = 0.13$ ,  $p = 0.0001$ ) and (b)  $R_{\text{growth}}$  ( $\text{RR}_{R_{\text{growth}}} = 0.0257x + 0.64$ ,  $R^2 = 0.07$ ,  $p = 0.002$ ). Colours indicate biome (Bor = boreal in skyblue, Temp = temperate in green and Trop = tropical in black). Leaf form is represented with different symbols with triangles for needleleaf and circles for broadleaf species. A response ratio  $> 1$  indicate an increased value in warming compared to control conditions, whereas a response ratio  $< 1$  indicate a decreased value in warming compared to control conditions.

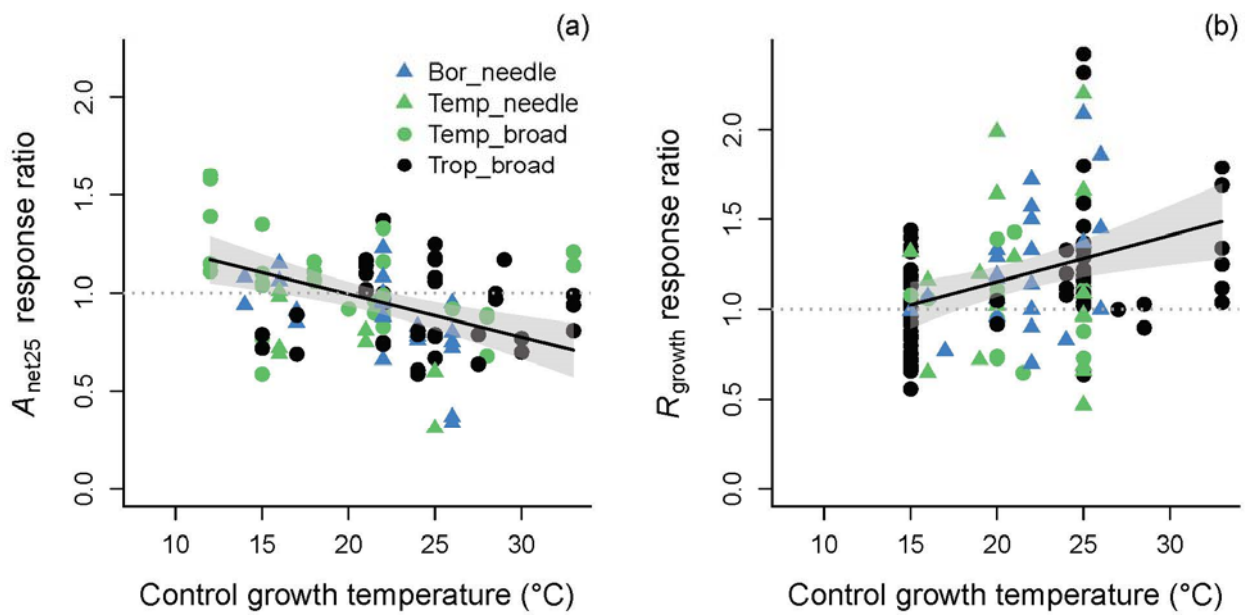

**Table S1.** Species list, including the plant functional type (PFT), biome where the species is found (Latitude, Longitude) based on information in the reference. The last column indicates whether the study was conducted in the field or in a controlled environment, albeit some field studies included controlled conditions such as open top chambers (OTC), whole tree chambers (WTC) or potted plant (POT).

| Biome  | Species                                    | PFT        | Latitude | Longitude | Reference                     | Field?<br>Controlled<br>Env? |
|--------|--------------------------------------------|------------|----------|-----------|-------------------------------|------------------------------|
| Boreal | <i>Abies balsamea</i>                      | needleleaf | 47.92    | -92.5     | Reich <i>et al.</i> , 2016    | Controlled                   |
| Boreal | <i>Abies faxoniana</i>                     | needleleaf | 31.59    | 102.58    | Yin <i>et al.</i> , 2008      | Controlled                   |
| Boreal | <i>Picea abies</i>                         | needleleaf | 64.12    | 19.45     | Lamba <i>et al.</i> , 2018    | Field                        |
| Boreal | <i>Picea abies</i>                         | needleleaf | 44.02    | -78.53    | Kroner & Way 2016             | Controlled                   |
| Boreal | <i>Picea aspertata</i>                     | needleleaf | 31.59    | 102.58    | Yin <i>et al.</i> , 2008      | Controlled                   |
| Boreal | <i>Picea crassifolia</i>                   | needleleaf | 34.05    | 128.25    | Zhang <i>et al.</i> , 2018    | Controlled                   |
| Boreal | <i>Picea glauca</i><br>(Deville/Wendover ) | needleleaf | 48.62    | -65.75    | Benomar <i>et al.</i> , 2018  | Field                        |
| Boreal | <i>Picea glauca</i>                        | needleleaf | 47.92    | -92.5     | Reich <i>et al.</i> , 2016    | Controlled                   |
| Boreal | <i>Picea koraiensis</i>                    | needleleaf | 35.94    | 104.15    | Zhang <i>et al.</i> , 2015    | Controlled                   |
| Boreal | <i>Picea likiangensis</i>                  | needleleaf | 35.94    | 104.15    | Zhang <i>et al.</i> , 2015    | Controlled                   |
| Boreal | <i>Picea mariana</i>                       | needleleaf | 49.11    | -74.61    | Way & Sage 2008               | Controlled                   |
| Boreal | <i>Picea mariana</i>                       | needleleaf | 49.11    | -74.61    | Dusenge <i>et al.</i> , 2020  | Controlled                   |
| Boreal | <i>Picea meyeri</i>                        | needleleaf | 35.94    | 104.15    | Zhang <i>et al.</i> , 2015    | Controlled                   |
| Boreal | <i>Picea wilsonii</i>                      | needleleaf | 37.5     | 109       | Zhang <i>et al.</i> , 2018    | Controlled                   |
| Boreal | <i>Pinus banksiana</i>                     | needleleaf | 47.92    | -92.5     | Reich <i>et al.</i> , 2016    | Controlled                   |
| Boreal | <i>Pinus banksiana</i>                     | needleleaf | 47.92    | -92.5     | Bermudez <i>et al.</i> , 2020 | Field                        |
| Boreal | <i>Pinus sylvestris</i>                    | needleleaf | 62.79    | 30.97     | Wang <i>et al.</i> , 1996     | Field                        |
| Boreal | <i>Pinus sylvestris</i>                    | needleleaf | -        |           | Kurepin <i>et al.</i> , 2018  | Controlled                   |
| Boreal | <i>Pinus sylvestris</i>                    | needleleaf | 62.79    | 30.97     | Kellomaki & Wang 1996         | Field, OTC                   |

|           |                                    |            |        |         |                                |            |
|-----------|------------------------------------|------------|--------|---------|--------------------------------|------------|
| Boreal    | <i>Pinus sylverstris</i>           | needleleaf | 62.24  | 33.07   | Smith & Dukes 2017             | Controlled |
| Temperate | <i>Acmena smithii</i>              | broadleaf  | -37.42 | 149.82  | Cunningham & Read 2002         | Controlled |
| Temperate | <i>Anoperus glandulosus</i>        | broadleaf  | -42.43 | 146.54  | Scafaro <i>et al.</i> , 2017   | Controlled |
| Temperate | <i>Antherosperma moschatum</i>     | broadleaf  | -41.29 | 145.89  | Scafaro <i>et al.</i> , 2017   | Controlled |
| Temperate | <i>Antherosperma moschatum</i>     | broadleaf  | -37.7  | 145.68  | Hill <i>et al.</i> , 1998      | Controlled |
| Temperate | <i>Ceratopetalum apetalum</i>      | broadleaf  | -31.17 | 152.4   | Hill <i>et al.</i> , 1998      | Controlled |
| Temperate | <i>Doryphora sassafras</i>         | broadleaf  | -31.83 | 151.45  | Hill <i>et al.</i> , 1998      | Controlled |
| Temperate | <i>Eucalyptus camadulensis</i> VIC | broadleaf  | -37.22 | 143.27  | Ferrar <i>et al.</i> , 1989    | Controlled |
| Temperate | <i>Eucalyptus incrassata</i>       | broadleaf  | -35.75 | 141.97  | Ferrar <i>et al.</i> , 1989    | Controlled |
| Temperate | <i>Eucalyptus paciflora</i> PS     | broadleaf  | -36.5  | 148.5   | Ferrar <i>et al.</i> , 1989    | Controlled |
| Temperate | <i>Eucalyptus paciflora</i> WP     | broadleaf  | -36.5  | 148.5   | Ferrar <i>et al.</i> , 1989    | Controlled |
| Temperate | <i>Eucalyptus argophloia</i>       | broadleaf  | -26.33 | 150.33  | Ngugi <i>et al.</i> 2003       | Controlled |
| Temperate | <i>Eucalyptus argophloia</i>       | broadleaf  | -27.03 | 150.95  | Oparah thesis, 2012            | Controlled |
| Temperate | <i>Eucalyptus boistoana</i>        | broadleaf  | -35.57 | 149.7   | Oparah thesis, 2012            | Controlled |
| Temperate | <i>Eucalyptus cloeziana</i>        | broadleaf  | -26.05 | 152.7   | Ngugi <i>et al.</i> , 2003     | Controlled |
| Temperate | <i>Eucalyptus fastigata</i>        | broadleaf  | -33.49 | 150.56  | Oparah thesis, 2012            | Controlled |
| Temperate | <i>Eucalyptus globoidea</i>        | broadleaf  | -34.57 | 148.72  | Oparah thesis, 2012            | Controlled |
| Temperate | <i>Eucalyptus globulus</i>         | broadleaf  | -38.8  | 143.62  | Crous <i>et al.</i> , 2013     | Field, WTC |
| Temperate | <i>Eucalyptus grandis</i>          | broadleaf  | -30.1  | 153.08  | Crous <i>et al.</i> , 2018     | Controlled |
| Temperate | <i>Eucalyptus regnans</i>          | broadleaf  | -37.46 | 147.46  | Warren <i>et al.</i> , 2008    | Controlled |
| Temperate | <i>Eucalyptus regnans</i>          | broadleaf  | -37.75 | 145.57  | Scafaro <i>et al.</i> , 2017   | Controlled |
| Temperate | <i>Eucalyptus saligma</i>          | broadleaf  | -30.57 | 152.15  | Ghannoum <i>et al.</i> , 2010  | Controlled |
| Temperate | <i>Eucalyptus saligna</i>          | broadleaf  | -33.6  | 150.73  | Crous <i>et al.</i> , 2011     | Field, WTC |
| Temperate | <i>Eucalyptus sideroxylon</i>      | broadleaf  | -32.99 | 147.89  | Ghannoum <i>et al.</i> , 2010  | Controlled |
| Temperate | <i>Eucalyptus tereticornis</i>     | broadleaf  | -29.1  | 152.58  | Crous <i>et al.</i> , 2018     | Controlled |
| Temperate | <i>Eucalyptus tereticornis</i>     | broadleaf  | -33.6  | 150.73  | Aspinwall <i>et al.</i> , 2016 | Field, WTC |
| Temperate | <i>Eucryphia lucida</i>            | broadleaf  | -42.68 | 146.67  | Hill <i>et al.</i> , 1998      | Controlled |
| Temperate | <i>Eucryphia lucida</i>            | broadleaf  | -41.17 | 144.95  | Cunningham & Read 2002         | Controlled |
| Temperate | <i>Eucryphia lucida</i>            | broadleaf  | -42.44 | 145.98  | Scafaro <i>et al.</i> , 2017   | Controlled |
| Temperate | <i>Eucryphia moorei</i>            | broadleaf  | -35.6  | 149.95  | Hill <i>et al.</i> , 1998      | Controlled |
| Temperate | <i>Hedycarya angustifolia</i>      | broadleaf  | -37.85 | 145.37  | Scafaro <i>et al.</i> , 2017   | Controlled |
| Temperate | <i>Juniperus monosperma</i>        | needleleaf | 35.84  | -106.29 | Collins <i>et al.</i> , 2021   | Field, OTC |

|           |                                |            |        |         |                                   |            |
|-----------|--------------------------------|------------|--------|---------|-----------------------------------|------------|
| Temperate | <i>Nothofagus cunninghamii</i> | broadleaf  | -42.68 | 146.67  | Hill <i>et al.</i> , 1998         | Controlled |
| Temperate | <i>Nothofagus cunninghamii</i> | broadleaf  | -41.15 | 145.02  | Cunningham & Read 2002            | Controlled |
| Temperate | <i>Nothofagus moorei</i>       | broadleaf  | -31.83 | 151.45  | Hill <i>et al.</i> , 1998         | Controlled |
| Temperate | <i>Pinus densiflora</i>        | needleleaf | 35.75  | -138.83 | Han <i>et al.</i> , 2004          | Field      |
| Temperate | <i>Pinus edulis</i>            | needleleaf | 35.84  | -106.29 | Collins <i>et al.</i> , 2021      | Field, OTC |
| Temperate | <i>Pinus nigra</i>             | needleleaf | 40.18  | -0.84   | Smith & Dukes 2017                | Controlled |
| Temperate | <i>Pinus pinaster</i>          | needleleaf | 41.08  | -6.73   | Smith & Dukes 2017                | Controlled |
| Temperate | <i>Pinus pinea</i>             | needleleaf | 37.53  | -6.68   | Smith & Dukes 2017                | Controlled |
| Temperate | <i>Pinus radiata</i>           | needleleaf | -43.42 | 172.97  | Ow <i>et al.</i> , 2008           | Controlled |
| Temperate | <i>Pinus strobus</i>           | needleleaf | 47.92  | -92.5   | Reich <i>et al.</i> , 2016        | Controlled |
| Temperate | <i>Pinus strobus</i>           | needleleaf | 46.66  | -92.52  | Bermudez <i>et al.</i> , 2020     | Field      |
| Temperate | <i>Pinus taeda</i>             | needleleaf | -      |         | Teskey & Will 1999                | Controlled |
| Temperate | <i>Pinus taeda</i>             | needleleaf | 34.95  | -83.98  | Wertin <i>et al.</i> , 2012       | Field, WTC |
| Temperate | <i>Quercus myrsinaefolia</i>   | broadleaf  | 35.68  | 139.6   | Hikosaka <i>et al.</i> , 1999     | Controlled |
| Temperate | <i>Sequoia sempervirens</i>    | needleleaf | -38.76 | 175.57  | Oparah thesis, 2012               | Controlled |
| Temperate | <i>Simmondsia chinensis</i>    | broadleaf  | 29.48  | -115.81 | Wardlaw <i>et al.</i> , 1983      | Controlled |
| Temperate | <i>Tasmania lanceolata</i>     | broadleaf  | -41.58 | 145.95  | Scafaro <i>et al.</i> , 2017      | Controlled |
| Temperate | <i>Telopea speciosissima</i>   | broadleaf  | -33.53 | 151.28  | Huang <i>et al.</i> , 2015        | Controlled |
| Temperate | <i>Tristaniopsis laurina</i>   | broadleaf  | -37.7  | 147.37  | Cunningham & Read 2002            | Controlled |
| Tropical  | Tropical species combined      | broadleaf  | -3.02  | -54.97  | Doughty <i>et al.</i> , 2011      | Field      |
| Tropical  | <i>Alchornea glandulosa</i>    | broadleaf  | -23.56 | -46.73  | Fauset <i>et al.</i> , 2019       | Field, OTC |
| Tropical  | <i>Alstonia scholaris</i>      | broadleaf  | -16.22 | 145.87  | Cunningham & Read 2002            | Controlled |
| Tropical  | <i>Anacardium excelsum</i>     | broadleaf  | 8.98   | -79.55  | Slot <i>et al.</i> , 2014         | Field      |
| Tropical  | <i>Bonamia trichantra</i>      | broadleaf  | 8.98   | -79.55  | Slot <i>et al.</i> , 2014         | Field      |
| Tropical  | <i>Bridelia brideliiifolia</i> | broadleaf  | -2.5   | 29.38   | Mujawamariya <i>et al.</i> , 2020 | Field, POT |
| Tropical  | <i>Bridelia micrantha</i>      | broadleaf  | -2.1   | 30.85   | Mujawamariya <i>et al.</i> , 2020 | Field, POT |
| Tropical  | <i>Calophyllum longifolium</i> | broadleaf  | 8.99   | -79.55  | Slot & Winter 2017                | Controlled |
| Tropical  | <i>Carapa grandiflora</i>      | broadleaf  | -2.5   | 29.05   | Mujawamariya <i>et al.</i> , 2020 | Field, POT |
| Tropical  | <i>Castanospermum australe</i> | broadleaf  | -26.63 | 153.63  | Cunningham & Read 2002            | Controlled |
| Tropical  | <i>Castanospermum australe</i> | broadleaf  | -16.86 | 145.64  | Scafaro <i>et al.</i> , 2017      | Controlled |
| Tropical  | <i>Castilla slastica</i>       | broadleaf  | 8.98   | -79.55  | Slot <i>et al.</i> , 2014         | Field      |
| Tropical  | <i>Cecropia insignis</i>       | broadleaf  | 8.98   | -79.55  | Slot & Winter 2018                | Controlled |

|          |                                    |           |        |        |                                                                  |            |
|----------|------------------------------------|-----------|--------|--------|------------------------------------------------------------------|------------|
| Tropical | <i>Chrysophyllum gorungosanum</i>  | broadleaf | -2.47  | 29.77  | Mujawamariya <i>et al.</i> , 2020                                | Field, POT |
| Tropical | <i>Croton megalocarpus</i>         | broadleaf | -2.47  | 29.77  | Mujawamariya <i>et al.</i> , 2020                                | Field, POT |
| Tropical | <i>Cryptocarya mackinnoniana</i>   | broadleaf | -16.8  | 145.64 | Scafaro <i>et al.</i> , 2017                                     | Controlled |
| Tropical | <i>Dombeya rotundifolia</i>        | broadleaf | -2.47  | 29.77  | Mujawamariya <i>et al.</i> , 2020                                | Field, POT |
| Tropical | <i>Eucalyptus camadulensis</i> QLD | broadleaf | -17.47 | 141.17 | Ferrar <i>et al.</i> , 1989                                      | Controlled |
| Tropical | <i>Eucalyptus miniata</i>          | broadleaf | -16.7  | 137.25 | Ferrar <i>et al.</i> , 1989                                      | Controlled |
| Tropical | <i>Entandrophragma excelsum</i>    | broadleaf | -2.47  | 29.77  | Mujawamariya <i>et al.</i> , 2020                                | Field, POT |
| Tropical | <i>Eucalyptus grandis</i>          | broadleaf | -16.58 | 145.4  | Crous <i>et al.</i> , 2018                                       | Controlled |
| Tropical | <i>Eucalyptus tereticornis</i>     | broadleaf | -16.73 | 145.33 | Crous <i>et al.</i> , 2018                                       | Controlled |
| Tropical | <i>Ficus insipida</i>              | broadleaf | 8.99   | -79.55 | Cheesman & Winter 2013                                           | Controlled |
| Tropical | <i>Ficus insipida</i>              | broadleaf | -      |        | Krause <i>et al.</i> , 2013                                      | Controlled |
| Tropical | <i>Ficus insipida</i>              | broadleaf | 8.99   | -79.55 | Slot & Winter, 2017                                              | Controlled |
| Tropical | <i>Ficus thonninghii</i>           | broadleaf | -2.47  | 29.77  | Mujawamariya <i>et al.</i> , 2020                                | Field, POT |
| Tropical | <i>Guarea guidonia</i>             | broadleaf | 18.3   | -65.83 | Carter <i>et al.</i> , 2021                                      | Field      |
| Tropical | <i>Harungana madagascariensis</i>  | broadleaf | -2.47  | 29.77  | Mujawamariya <i>et al.</i> , 2020                                | Field, POT |
| Tropical | <i>Harungana montana</i>           | broadleaf | -2.5   | 29.38  | Mujawamariya <i>et al.</i> , 2020,<br>Dusenge <i>et al.</i> 2021 | Field, POT |
| Tropical | <i>Heritiera trifoliolata</i>      | broadleaf | -28.6  | 152.72 | Cunningham & Read 2002                                           | Field, POT |
| Tropical | <i>Itea chinensis</i>              | broadleaf | 23.17  | 112.17 | Li <i>et al.</i> , 2020                                          | Field      |
| Tropical | <i>Luehea seemannii</i>            | broadleaf | 8.99   | -79.55 | Slot <i>et al.</i> , 2014                                        | Field      |
| Tropical | <i>Macaranga kilimandscharica</i>  | broadleaf | -2.5   | 29.38  | Mujawamariya <i>et al.</i> , 2020                                | Field, POT |
| Tropical | <i>Machilus breviflora</i>         | broadleaf | 23.17  | 112.17 | Li <i>et al.</i> , 2020                                          | Field      |
| Tropical | <i>Maesa lanceolata</i>            | broadleaf | -2.5   | 29.38  | Mujawamariya <i>et al.</i> , 2020                                | Field, POT |
| Tropical | <i>Markhamia lutea</i>             | broadleaf | -2.1   | 30.85  | Mujawamariya <i>et al.</i> , 2020                                | Field, POT |
| Tropical | <i>Ochroma pyramidale</i>          | broadleaf | 8.99   | -79.55 | Cheesman & Winter 2013                                           | Controlled |
| Tropical | <i>Ochroma pyramidale</i>          | broadleaf | 8.99   | -79.55 | Slot & Winter 2017                                               | Controlled |
| Tropical | <i>Ocotea sintenisii</i>           | broadleaf | 18.3   | -65.83 | Carter <i>et al.</i> , 2021                                      | Field      |
| Tropical | <i>Ormosia macrocalyx</i>          | broadleaf | 8.99   | -79.55 | Cheesman & Winter 2013                                           | Controlled |
| Tropical | <i>Piper glabrescens</i>           | broadleaf | 18.3   | -65.83 | Carter <i>et al.</i> , 2020                                      | Field      |
| Tropical | <i>Polyscias fulva</i>             | broadleaf | -2.5   | 29.38  | Mujawamariya <i>et al.</i> , 2020                                | Field, POT |
| Tropical | <i>Prunus africana</i>             | broadleaf | -2.5   | 29.38  | Mujawamariya <i>et al.</i> , 2020                                | Field, POT |
| Tropical | <i>Psychotria brachiata</i>        | broadleaf | -18.3  | -65.83 | Carter <i>et al.</i> , 2020                                      | Field      |

|          |                                  |           |        |        |                                                                  |            |
|----------|----------------------------------|-----------|--------|--------|------------------------------------------------------------------|------------|
| Tropical | <i>Quercus virginiana</i>        | broadleaf | 28.28  | -82.23 | Smith & Dukes 2017                                               | Controlled |
| Tropical | <i>Schima superba</i>            | broadleaf | 23.88  | 121.14 | Sheu & Lin 1999                                                  | Controlled |
| Tropical | <i>Schima superba</i>            | broadleaf | 23.17  | 112.17 | Li <i>et al.</i> , 2020                                          | Field      |
| Tropical | <i>Sloanea woollsii</i>          | broadleaf | -30.72 | 152.72 | Cunningham & Read 2002                                           | Controlled |
| Tropical | <i>Stigmaphyllon lindenianum</i> | broadleaf | 8.98   | -79.55 | Slot <i>et al.</i> , 2014                                        | Field      |
| Tropical | <i>Synima cordierorum</i>        | broadleaf | -17.38 | 145.51 | Scafaro <i>et al.</i> , 2017                                     | Controlled |
| Tropical | <i>Syzygium guineense</i>        | broadleaf | -2.5   | 29.38  | Mujawamariya <i>et al.</i> , 2020,<br>Dusenge <i>et al.</i> 2021 | Field, POT |
| Tropical | <i>Syzygium rehderianum</i>      | broadleaf | 23.17  | 112.17 | Li <i>et al.</i> , 2020                                          | Field      |
| Tropical | <i>Syzygium sayeri</i>           | broadleaf | -17.23 | 145.47 | Scafaro <i>et al.</i> , 2017                                     | Controlled |
| Tropical | <i>Tabebuia rosea</i>            | broadleaf | 8.98   | -79.55 | Slot & Winter 2018, Slot <i>et al.</i> 2021                      | Controlled |
| Tropical | <i>Tamarindus indica</i>         | broadleaf | 26.63  | -81.44 | Smith & Dukes 2017                                               | Controlled |
| Tropical | <i>Virola surinamensis</i>       | broadleaf | 8.98   | -79.55 | Slot & Winter 2018                                               | Controlled |
|          |                                  |           |        |        |                                                                  |            |

**Table S2.** (a) ANCOVA results (F-statistic and p-value) with leaf form as categorical variable and mean annual temperature (mat) as the covariate using absolute values of the control treatments only, transformed where necessary. (b) ANCOVA results (F-statistic and p-value) with warming amount, biome and leaf form as categorical variables and mean annual temperature as covariate on the response ratios to warming (RR) to test the effects of warming, except for  $T_{\text{optA}}$  where the absolute shift and the shift per °C warming was evaluated. Sources of the model are the columns and variables from the rows, df are the degrees of freedom for each source and the sample size for each variable is found in the second column (Total Obs.). P-values are indicated in bold when significant  $< 0.05$ .

| (a) Control conditions | Total Obs. | Leaf form<br>df = 1 |                   | mat (cov)<br>df = 1 |                   |
|------------------------|------------|---------------------|-------------------|---------------------|-------------------|
| Variable               |            | F                   | p                 | F                   | p                 |
| $V_{\text{cmax25}}$    | 69         | 8.93                | <b>0.004</b>      | 9.67                | <b>0.003</b>      |
| $J_{\text{max25}}$     | 68         | 18.14               | <b>&lt;0.0001</b> | 21.78               | <b>&lt;0.0001</b> |
| $J:V_{25}$             | 53         | 11.33               | <b>0.0015</b>     | 9.45                | <b>0.0036</b>     |
| $A_{\text{net25}}$     | 106        | 0.007               | 0.93              | 4.26                | <b>0.042</b>      |
| $T_{\text{optA}}$      | 56         | 4.11                | <b>0.048</b>      | 19.54               | <b>&lt;0.0001</b> |
| $A_{\text{growth}}$    | 54         | 5.81                | <b>0.020</b>      | 0.21                | 0.64              |
| $R_{\text{growth}}$    | 126        | 0.52                | 0.47              | 1.04                | 0.31              |
| $R_{25}$               | 129        | 0.61                | 0.44              | 2.29                | 0.13              |
| $N_{\text{a}}$         | 109        | 0.0035              | 0.95              | 3.17                | 0.078             |



| (b) Response ratios                          | Total Obs. | Warming amount (binned), df = 2 |               | Mat (cov) df = 1 |              | Leaf form df = 1 |                   | Amount*leaf form df = 2 |               |
|----------------------------------------------|------------|---------------------------------|---------------|------------------|--------------|------------------|-------------------|-------------------------|---------------|
| Variable                                     |            | F                               | p             | F                | p            | F                | p                 | F                       | p             |
| $T_{\text{optA\_abs shift}}$                 | 56         | 6.09                            | <b>0.0047</b> | 1.49             | 0.23         | 0.12             | 0.73              | 1.32                    | 0.28          |
| $T_{\text{optA\_shift per } ^\circ\text{C}}$ | 56         | 0.077                           | 0.93          | 0.22             | 0.64         | 1.41             | 0.24              | 0.55                    | 0.58          |
| RR_ $V_{\text{cmax25}}$                      | 69         | 0.043                           | 0.96          | 4.82             | <b>0.03</b>  | 0.22             | 0.64              | 2.60                    | 0.08          |
| RR_ $J_{\text{max25}}$                       | 68         | 0.52                            | 0.60          | 0.98             | 0.33         | 0.027            | 0.87              | 1.70                    | 0.19          |
| RR_ $J:V_{25}$                               | 53         | 0.026                           | 0.97          | 7.87             | <b>0.008</b> | 4.66             | <b>0.037</b>      | 0.13                    | 0.88          |
| RR_ $A_{\text{net25}}$                       | 106        | 0.19                            | 0.83          | 7.91             | <b>0.006</b> | 17.27            | <b>&lt;0.0001</b> | 5.69                    | <b>0.0047</b> |
| RR_ $A_{\text{growth}}$                      | 54         | 0.035                           | 0.25          | 0.01             | 0.90         | 9.24             | <b>0.004</b>      | 1.95                    | 0.17          |
| RR_ $R_{\text{growth}}$                      | 126        | 2.64                            | 0.076         | 3.04             | 0.084        | 4.45             | <b>0.037</b>      | 0.41                    | 0.67          |
| RR_ $R_{25}$                                 | 129        | 1.15                            | 0.32          | 2.36             | 0.13         | 1.92             | 0.17              | 5.30                    | <b>0.0063</b> |
| RR_ $Q_{10}$                                 | 27         | 4.18                            | <b>0.032</b>  | 0.06             | 0.81         | 0.49             | 0.49              | 0.20                    | 0.82          |
| RR_ $N_a$                                    | 109        | 3.05                            | 0.052         | 0.85             | 0.36         | 0.31             | 0.58              | 0.77                    | 0.47          |

Variables are: The absolute shift in temperature optimum of photosynthesis ( $T_{\text{optA\_abs shift}}$ ), the relative shift in  $T_{\text{optA}}$  per  $^\circ\text{C}$  warming ( $T_{\text{optA\_shift per } ^\circ\text{C}}$ ), the maximum carboxylation rate,  $V_{\text{cmax25}}$ , the maximum electron transport rate,  $J_{\text{max25}}$ , the ratio of  $J_{\text{max25}}$  over  $V_{\text{cmax25}}$ ,  $J:V_{25}$  and net photosynthesis,  $A_{\text{net25}}$ . all measured at a common temperature of  $25^\circ\text{C}$ , Photosynthesis and respiration measured at their growth temperatures ( $A_{\text{growth}}$  and  $R_{\text{growth}}$  respectively), mitochondrial dark respiration measured at  $25^\circ\text{C}$ ,  $R_{25}$ , the temperature sensitivity of respiration,  $Q_{10}$ , and area-based leaf nitrogen content,  $N_a$ . The response ratios of these variables are indicated with RR and are all log-transformed to meet normality assumptions.

**Table S3.** Sample sizes in each category (warming amount, biome and leaf form) for each variable: Maximum carboxylation rate at 25 °C ( $V_{\text{cmax}25}$ ), Maximum electron transport rate at 25 °C ( $J_{\text{max}25}$ ), the ratio of  $V_{\text{cmax}}/J_{\text{max}}$  at 25 °C ( $J:V_{25}$ ), net photosynthesis at 25 °C ( $A_{\text{net}25}$ ) and net photosynthesis at prevailing growth temperatures ( $A_{\text{growth}}$ ), the temperature optimum of photosynthesis ( $T_{\text{optA}}$ ), mitochondrial respiration at 25 °C ( $R_{25}$ ), and dark respiration at growth temperatures ( $R_{\text{growth}}$ ) and area-based nitrogen content ( $N_a$ ).

| Variable            | Warming amount                          | Biome                                          | Leaf form                  |
|---------------------|-----------------------------------------|------------------------------------------------|----------------------------|
| $V_{\text{cmax}25}$ | < 5°C - 19<br>5-10°C - 38<br>>10°C - 12 | Boreal - 10<br>Temperate - 38<br>Tropical - 21 | Broad - 45<br>Needles - 24 |
| $J_{\text{max}25}$  | < 5°C - 18<br>5-10°C - 38<br>>10°C - 12 | Boreal - 9<br>Temperate - 37<br>Tropical - 22  | Broad - 45<br>Needles - 23 |
| $J:V_{25}$          | < 5°C - 17<br>5-10°C - 28<br>>10°C - 8  | Boreal - 5<br>Temperate - 30<br>Tropical - 18  | Broad - 40<br>Needles - 13 |
| $A_{\text{net}25}$  | < 5°C - 37<br>5-10°C - 41<br>>10°C - 28 | Boreal - 24<br>Temperate - 45<br>Tropical - 37 | Broad - 72<br>Needles - 34 |
| $A_{\text{growth}}$ | < 5°C - 9<br>5-10°C - 33<br>>10°C - 12  | Boreal - 9<br>Temperate - 26<br>Tropical - 19  | Broad - 43<br>Needles - 11 |
| $T_{\text{optA}}$   | < 5°C - 17<br>5-10°C - 18<br>>10°C - 21 | Boreal - 13<br>Temperate - 26<br>Tropical - 17 | Broad - 40<br>Needles - 16 |
| $R_{25}$            | < 5°C - 49<br>5-10°C - 57<br>>10°C - 23 | Boreal - 31<br>Temperate - 32<br>Tropical - 66 | Broad - 73<br>Needles - 56 |
| $R_{\text{growth}}$ | < 5°C - 47<br>5-10°C - 62<br>>10°C - 17 | Boreal - 24<br>Temperate - 36<br>Tropical - 66 | Broad - 84<br>Needles - 42 |
| $N_a$               | < 5°C - 36<br>5-10°C - 57<br>>10°C - 16 | Boreal - 13<br>Temperate - 38<br>Tropical - 58 | Broad - 83<br>Needles - 26 |

## References used in Table S1

- Aspinwall MJ, Drake JE, Company C, Varhammar A, Ghannoum O, Tissue DT, Reich PB, Tjoelker MG. 2016.** Convergent acclimation of leaf photosynthesis and respiration to prevailing ambient temperatures under current and warmer climates in *Eucalyptus tereticornis*. *New Phytologist* **212**(2): 354-367.
- Benomar L, Lamhamedi MS, Pepin S, Rainville A, Lambert MC, Margolis HA, Bousquet J, Beaulieu J. 2018.** Thermal acclimation of photosynthesis and respiration of southern and northern white spruce seed sources tested along a regional climatic gradient indicates limited potential to cope with temperature warming. *Annals of Botany* **121**(3): 443-457.
- Bermudez R, Stefanski A, Montgomery RA, Reich PB. 2020.** Short- and long-term responses of photosynthetic capacity to temperature in four boreal tree species in a free-air warming and rainfall manipulation experiment. *Tree Physiology* **41**: 89-102.
- Carter KR, Wood TE, Reed SC, Butts KM, Cavaleri MA. 2021.** Experimental warming across a tropical forest canopy height gradient reveals minimal photosynthetic and respiratory acclimation. *Plant Cell and Environment* **44**(9):2879-2897.
- Carter KR, Wood TE, Reed SC, Schwartz EC, Reinsel MB, Yang X, Cavaleri MA. 2020.** Photosynthetic and respiratory acclimation of understory shrubs in response to *in situ* experimental warming of a wet tropical forest. *Frontiers in Forests and Global Change* **3**:1-20.
- Cheesman AW, Winter K. 2013a.** Elevated night-time temperatures increase growth in seedlings of two tropical pioneer tree species. *New Phytologist* **197**(4): 1185-1192.
- Cheesman AW, Winter K. 2013b.** Growth response and acclimation of CO<sub>2</sub> exchange characteristics to elevated temperatures in tropical tree seedlings. *Journal of Experimental Botany* **64**(12): 3817-3828.
- Collins AD, Ryan MG, Adams HD, Dickman LT, Garcia-Forner N, Grossiord C, Powers HH, Sevanto S, McDowell NG.** Foliar respiration is related to photosynthetic, growth and carbohydrate response to experimental drought and elevated temperature. *Plant Cell and Environment* **44**(9):3853-3865.
- Crous KY, Drake JE, Aspinwall MJ, Sharwood RE, Tjoelker MG, Ghannoum O. 2018.** Photosynthetic capacity and leaf nitrogen decline along a controlled climate gradient in provenances of two widely distributed *Eucalyptus* species. *Global Change Biology* **24**(10): 4626-4644.
- Crous KY, Quentin AG, Lin YS, Medlyn BE, Williams DG, Barton CVM, Ellsworth DS. 2013.** Photosynthesis of temperate *Eucalyptus globulus* trees outside their native range has limited adjustment to elevated CO<sub>2</sub> and climate warming. *Global Change Biology* **19**(12): 3790-3807.
- Crous KY, Zaragoza-Castells J, Low M, Ellsworth DS, Tissue DT, Tjoelker MG, Barton CVM, Gimeno TE, Atkin OK. 2011.** Seasonal acclimation of leaf respiration in *Eucalyptus saligna* trees: impacts of elevated atmospheric CO<sub>2</sub> and summer drought. *Global Change Biology* **17**(4): 1560-1576.
- Cunningham SC, Read J. 2002.** Comparison of temperate and tropical rainforest tree species: photosynthetic responses to growth temperature. *Oecologia* **133**(2): 112-119.
- Doughty CE. 2011.** An *in situ* leaf and branch warming experiment in the Amazon. *Biotropica* **43**(6): 658-665.
- Dusenge ME, Madhavji S, Way DA. 2020.** Contrasting acclimation responses to elevated CO<sub>2</sub> and warming between an evergreen and a deciduous boreal conifer. *Global Change Biology* **26**(6): 3639-3657.
- Dusenge ME, Wittemann M, Mujawamariya M, Ntawuhiganayo EB, Zibera E, Ntirugulirwa B, Way DA, Nsabimana D, Uddling J, Wallin G. 2021.** Limited thermal acclimation of photosynthesis in tropical montane tree species. *Global Change Biology* **27**(19):4860-4878.

- Fauset S, Oliveira L, Buckeridge MS, Foyer CH, Galbraith D, Tiwari R, Gloor M. 2019.** Contrasting responses of stomatal conductance and photosynthetic capacity to warming and elevated CO<sub>2</sub> in the tropical tree species *Alchornea glandulosa* under heatwave conditions. *Environmental and Experimental Botany* **158**: 28-39.
- Ferrar PJ, Slatyer RO, Vranjic JA. 1989.** Photosynthetic temperature acclimation in *Eucalyptus* species from diverse habitats, and a comparison with *Nerium oleander*. *Australian Journal of Plant Physiology* **16**(2): 199-217.
- Ghannoum O, Phillips NG, Sears MA, Logan BA, Lewis JD, Conroy JP, Tissue DT. 2010.** Photosynthetic responses of two eucalypts to industrial-age changes in atmospheric CO<sub>2</sub> and temperature. *Plant Cell and Environment* **33**(10): 1671-1681.
- Han QM, Kawasaki T, Nakano T, Chiba Y. 2004.** Spatial and seasonal variability of temperature responses of biochemical photosynthesis parameters and leaf nitrogen content within a *Pinus densiflora* crown. *Tree Physiology* **24**(7): 737-744.
- Hikosaka K, Murakami A, Hirose T. 1999.** Balancing carboxylation and regeneration of ribulose-1,5-bisphosphate in leaf photosynthesis: temperature acclimation of an evergreen tree, *Quercus myrsinaefolia*. *Plant Cell and Environment* **22**(7): 841-849.
- Hill RS, Read J, Busby JR. 1998.** The temperature dependence of photosynthesis of some Australian temperate rainforest trees and its biogeographical significance. *Journal of Biogeography* **15**(3): 431-449.
- Huang GM, Rymer PD, Duan HL, Smith RA, Tissue DT. 2015.** Elevated temperature is more effective than elevated CO<sub>2</sub> in exposing genotypic variation in *Telopea speciosissima* growth plasticity: implications for woody plant populations under climate change. *Global Change Biology* **21**(10): 3800-3813.
- Kellomaki S, Wang KY. 1996.** Photosynthetic responses to needle water potentials in Scots pine after a four-year exposure to elevated CO<sub>2</sub> and temperature. *Tree Physiology* **16**(9): 765-772.
- Krause GH, Cheesman AW, Winter K, Krause B, Virgo A. 2013.** Thermal tolerance, net CO<sub>2</sub> exchange and growth of a tropical tree species, *Ficus insipida*, cultivated at elevated daytime and nighttime temperatures. *Journal of Plant Physiology* **170**(9): 822-827.
- Kroner Y, Way DA. 2016.** Carbon fluxes acclimate more strongly to elevated growth temperatures than to elevated CO<sub>2</sub> concentrations in a northern conifer. *Global Change Biology* **22**(8): 2913-2928.
- Kurepin LV, Stangl ZR, Ivanov AG, Bui V, Mema M, Huner NPA, Oquist G, Way D, Hurry V. 2018.** Contrasting acclimation abilities of two dominant boreal conifers to elevated CO<sub>2</sub> and temperature. *Plant Cell and Environment* **41**(6): 1331-1345.
- Lamba S, Hall M, Rantfors M, Chaudhary N, Linder S, Way D, Uddling J, Wallin G. 2018.** Physiological acclimation dampens initial effects of elevated temperature and atmospheric CO<sub>2</sub> concentration in mature boreal Norway spruce. *Plant Cell and Environment* **41**(2): 300-313.
- Li Y, Xu Y, Li Y, Wu T, Zhou G, Liu S, Meng Y, Wang J, Ling L, Liu J. 2020.** Warming effects on morphological and physiological performances of four subtropical montane tree species. *Annals of Forest Science* **77**(2):1-11.
- Mujawamariya M, Wittemann M, Manishimwe A, Ntirugulirwa B, Zibera E, Nsabimana D, Wallin G, Uddling J, Dusenge ME. 2021.** Complete or overcompensatory thermal acclimation of leaf dark respiration in African tropical trees. *New Phytologist* **229**(5): 2548-2561.
- Ngugi MR, Hunt MA, Doley D, Ryan P, Dart PJ. 2003.** Photosynthetic light and temperature responses of *Eucalyptus cloeziana* and *Eucalyptus argophloia*. *Australian Journal of Botany* **51**(5): 573-583.
- Oparah IA. 2012.** *Photosynthetic acclimation to temperature of four Eucalyptus species and Sequoia sempervirens*. PhD Thesis, University of Canterbury, New Zealand.
- Ow LF, Whitehead D, Walcroft AS, Turnbull MH. 2008.** Thermal acclimation of respiration but not photosynthesis in *Pinus radiata*. *Functional Plant Biology* **35**(6): 448-461.

- Reich PB, Sendall KM, Stefanski A, Wei XR, Rich RL, Montgomery RA. 2016.** Boreal and temperate trees show strong acclimation of respiration to warming. *Nature* **531**(7596): 633-636.
- Scafaro AP, Xiang S, Long BM, Bahar NHA, Weerasinghe LK, Creek D, Evans JR, Reich PB, Atkin OK. 2017.** Strong thermal acclimation of photosynthesis in tropical and temperate wet-forest tree species: the importance of altered Rubisco content. *Global Change Biology* **23**(7): 2783-2800.
- Sheu BH, Lin CK. 1999.** Photosynthetic response of seedlings of the sub-tropical tree *Schima superba* with exposure to elevated carbon dioxide and temperature. *Environmental and Experimental Botany* **41**(1): 57-65.
- Slot M, Rey-Sanchez C, Gerber S, Lichstein JW, Winter K, Kitajima K. 2014.** Thermal acclimation of leaf respiration of tropical trees and lianas: response to experimental canopy warming, and consequences for tropical forest carbon balance. *Global Change Biology* **20**(9): 2915-2926.
- Slot M, Rifai SW, Winter K. 2021.** Photosynthetic plasticity of a tropical tree species, *Tabebuia rosea*, in response to elevated temperature and CO<sub>2</sub>. *Plant Cell and Environment* **44**(7): 2347-2364.
- Slot M, Winter K. 2017.** Photosynthetic acclimation to warming in tropical forest tree seedlings. *Journal of Experimental Botany* **68**(9): 2275-2284.
- Slot M, Winter K. 2018.** High tolerance of tropical sapling growth and gas exchange to moderate warming. *Functional Ecology* **32**(3): 599-611.
- Smith NG, Dukes JS. 2017.** Short-term acclimation to warmer temperatures accelerates leaf carbon exchange processes across plant types. *Global Change Biology* **23**(11): 4840-4853.
- Teskey RO, Will RE. 1999.** Acclimation of loblolly pine (*Pinus taeda*) seedlings to high temperatures. *Tree Physiology* **19**(8): 519-525.
- Wang KY, Kellomaki S, Laitinen K. 1996.** Acclimation of photosynthetic parameters in Scots pine after three years exposure to elevated temperature and CO<sub>2</sub>. *Agricultural and Forest Meteorology* **82**(1-4): 195-217.
- Wardlaw IF, Begg JE, Bagnall D, Dunstone RL. 1983.** Jojoba - temperature adaptation as expressed in growth and leaf function. *Australian Journal of Plant Physiology* **10**(3): 299-312.
- Warren CR. 2008.** Stand aside stomata, another actor deserves centre stage: the forgotten role of the internal conductance to CO<sub>2</sub> transfer. *Journal of Experimental Botany* **59**(7): 1475-1487.
- Way DA, Sage RF. 2008a.** Elevated growth temperatures reduce the carbon gain of black spruce *Picea mariana* (Mill.) BSP. *Global Change Biology* **14**(3): 624-636.
- Way DA, Sage RF. 2008b.** Thermal acclimation of photosynthesis in black spruce *Picea mariana* (Mill.) BSP. *Plant Cell and Environment* **31**(9): 1250-1262.
- Wertin TM, McGuire MA, van Iersel M, Ruter JM, Teskey RO. 2012.** Effects of elevated temperature and CO<sub>2</sub> on photosynthesis, leaf respiration, and biomass accumulation of *Pinus taeda* seedlings at a cool and a warm site within the species' current range. *Canadian Journal of Forest Research* **42**(5): 943-957.
- Yin HJ, Liu Q, Lai T. 2008.** Warming effects on growth and physiology in the seedlings of the two conifers *Picea asperata* and *Abies faxoniana* under two contrasting light conditions. *Ecological Research* **23**(2): 459-469.
- Zhang XW, Chen LT, Wang JR, Wang MH, Yang SL, Zhao CM. 2018.** Photosynthetic acclimation to long-term high temperature and soil drought stress in two spruce species (*Picea crassifolia* and *P. wilsonii*) used for afforestation. *Journal of Forestry Research* **29**(2): 363-372.
- Zhang XW, Wang JR, Ji MF, Milne RI, Wang MH, Liu JQ, Shi S, Yang SL, Zhao CM. 2015.** Higher thermal acclimation potential of respiration but not photosynthesis in two alpine *Picea* taxa in contrast to two lowland congeners. *Plos One* **10**(4) :e0123248.
